# Supplementary material
Source: PubMed Central journal article supplement (PMC9327692)
Supplement: jvi.00676-22-s0001.pdf [file jvi.00676-22-s0001.pdf]

## Supplementary Figures

**Figure S1.**

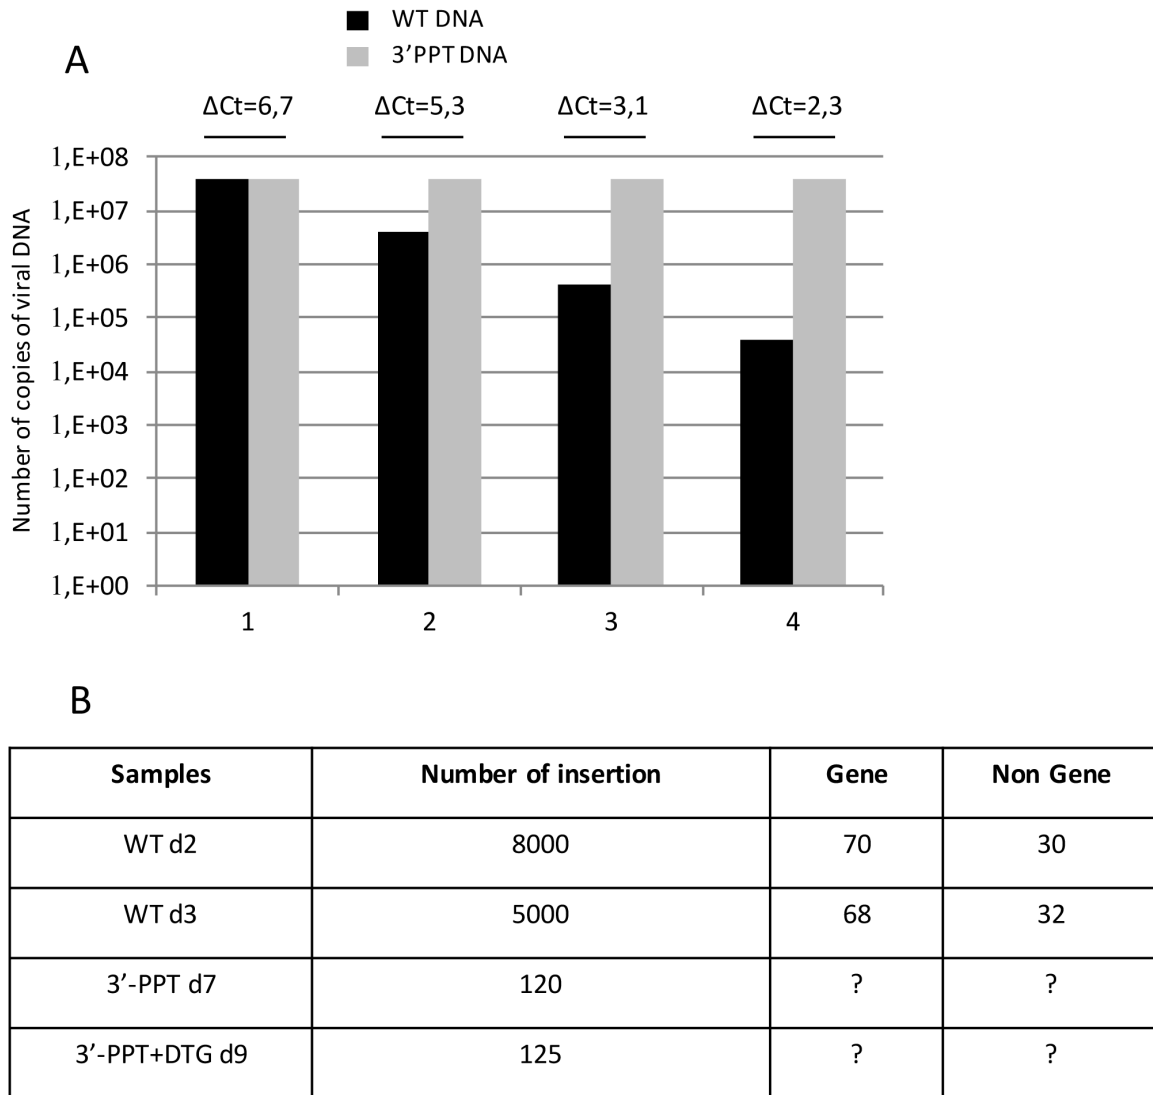

**Figure S1. Increasing the sensitivity of integrated viral DNA detection among nonintegrated viral DNA.** (A) A known amount of integrated viral DNA from a WT infection ( $4 \times 10^7$  copies of integrated viral DNA) was diluted in a constant amount of viral DNA from a 3'-PPT mutant infection ( $4 \times 10^7$  copies of viral DNA). Integrated viral DNA quantification was performed increasing the number of cycles for the first Alu-LTR PCR. Black column: integrated WT viral DNA. Grey column: 3'-PPT viral DNA. 1:  $4 \times 10^7$  copies of integrated WT DNA mixed with  $4 \times 10^7$  copies of 3'-PPT mutant DNA. 2:  $4 \times 10^6$  copies of integrated WT DNA mixed with  $4 \times 10^7$  copies of 3'-PPT mutant DNA. 3:  $4 \times 10^5$  copies of integrated WT DNA mixed with  $4 \times 10^7$  copies of 3'-PPT mutant DNA. 4:  $4 \times 10^4$  copies of integrated WT DNA mixed with  $4 \times 10^7$  copies of 3'-PPT mutant DNA. The  $\Delta C_t$  are indicated. (B) Integration site analysis. DNA from cells infected with WT or 3'-PPT mutant viruses were analyzed for integrated viral DNA sites. All experiments were repeated three times.

**Figure S2**

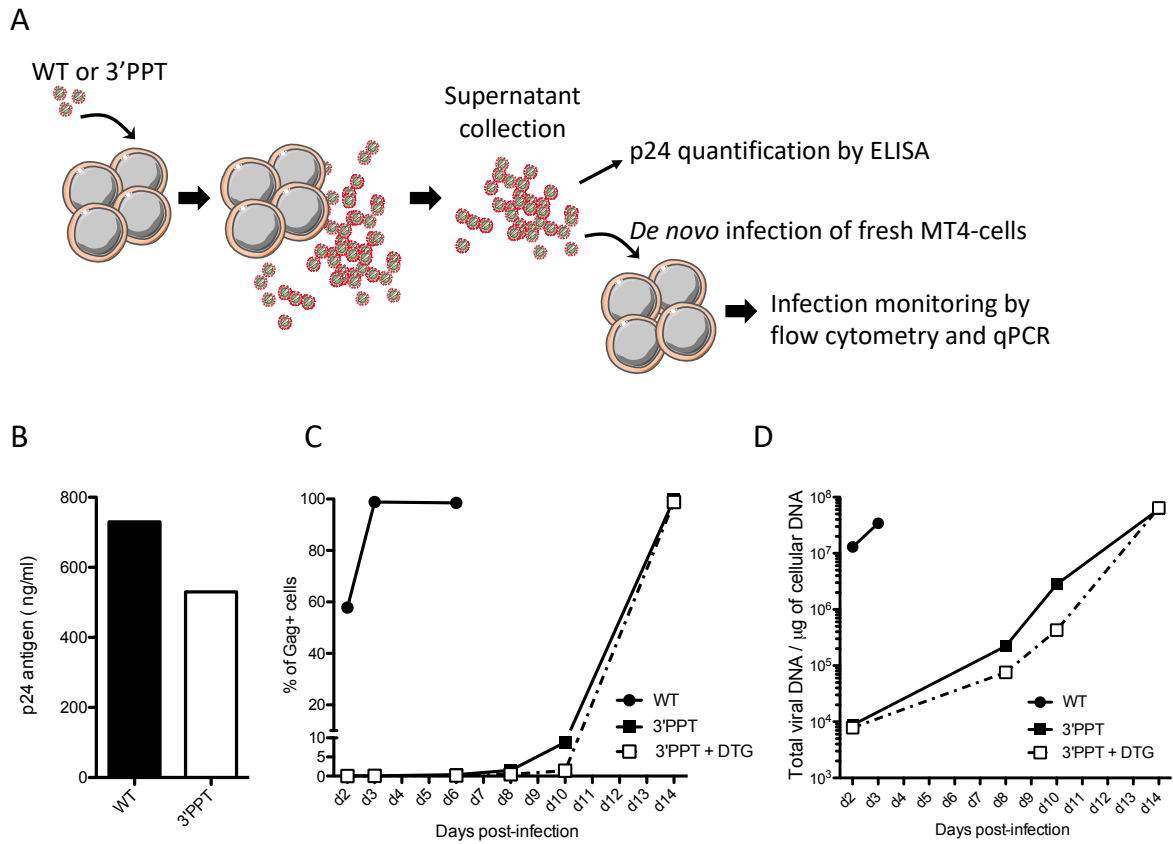

**Figure S2. The 3'-PPT mutant produces infectious viral particles.** (A-D) MT4-cells were infected with WT or 3'-PPT mutant. Supernatants were collected from infected cells at day 2 for WT infection and day 7 for 3'-PPT infection. (B) p24 antigen in supernatants were quantified by ELISA. (C-D) Fresh MT4-cells were infected with these supernatants in absence or presence of 500 nM DTG for the 3'-PPT supernatant. De novo infection was monitored in MT4 cells by intracellular staining of gag antigen using an anti-Gag antibody conjugated to phycoerythrin (PE) (C) and by quantification of total viral DNA by qPCR (D).

**Figure S3**

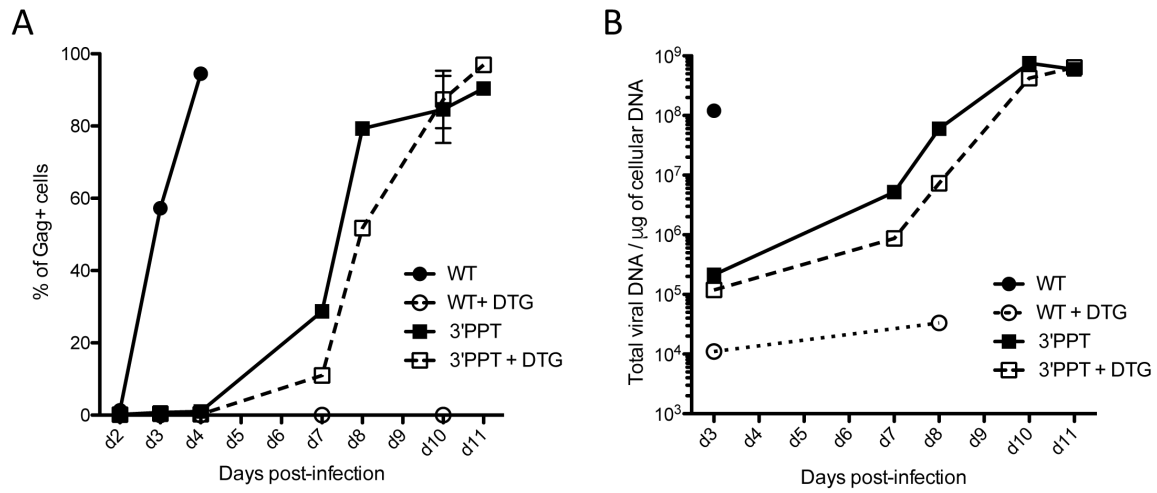

**Figure S3. Replication of the 3'-PPT mutant virus in CEMss cells.** CEMss cells were infected with WT or 3'-PPT mutant viruses with or without 500 nM DTG. (A) The percentage of infected cells during the course of infection was followed by intracellular staining of gag antigen using an anti-Gag antibody conjugated to phycoerythrin (PE). The graph represents the mean  $\pm$  SD of two independent experiments. (B) Total viral DNA was quantified by qPCR and was normalized against the cellular DNA content (in  $\mu\text{g}$ ).

Figure S4

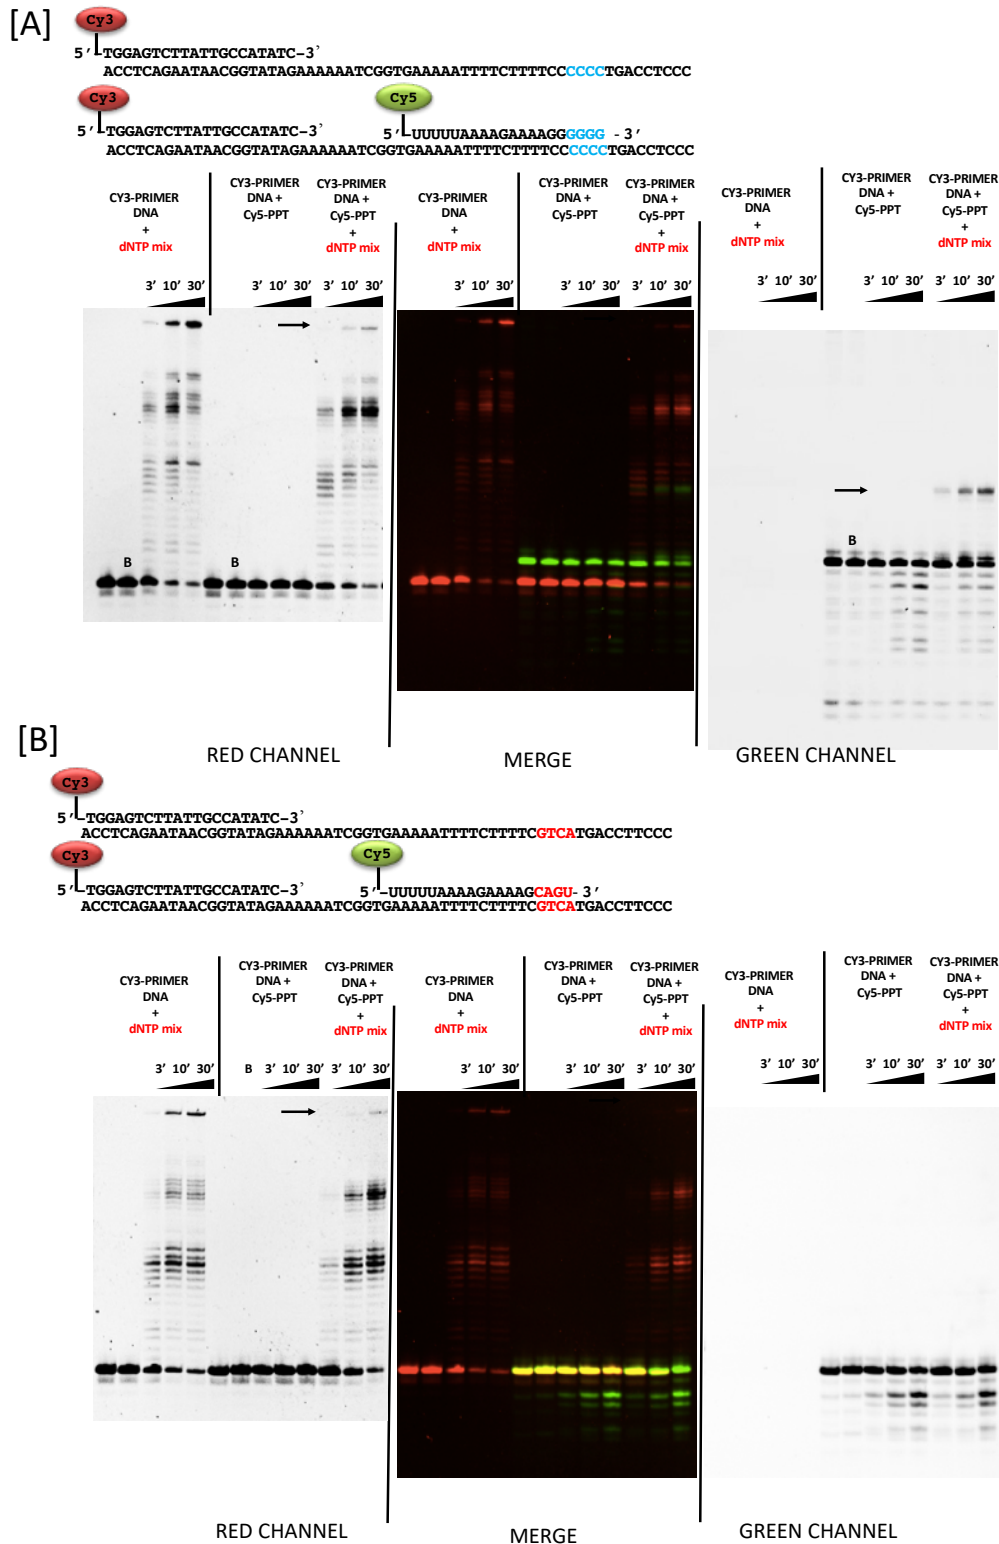

**Figure S4. PPT processing by HIV-1 WT RT.** Elongation and strand displacement WT 3'-PPT (A) and mutated 3'-PPT (B). Reaction products resolved by high voltage denaturing 15% polyacrylamide gel electrophoresis (Acrylamide/bisacrylamide ratio 19:1, 7M Urea in Tris Borate EDTA buffer 1X) and visualized by fluorescent dual channel imaging (ChemiDoc Biorad). Bands were analyzed and quantified by ImageLab™ version 6.0.1.

Figure S5

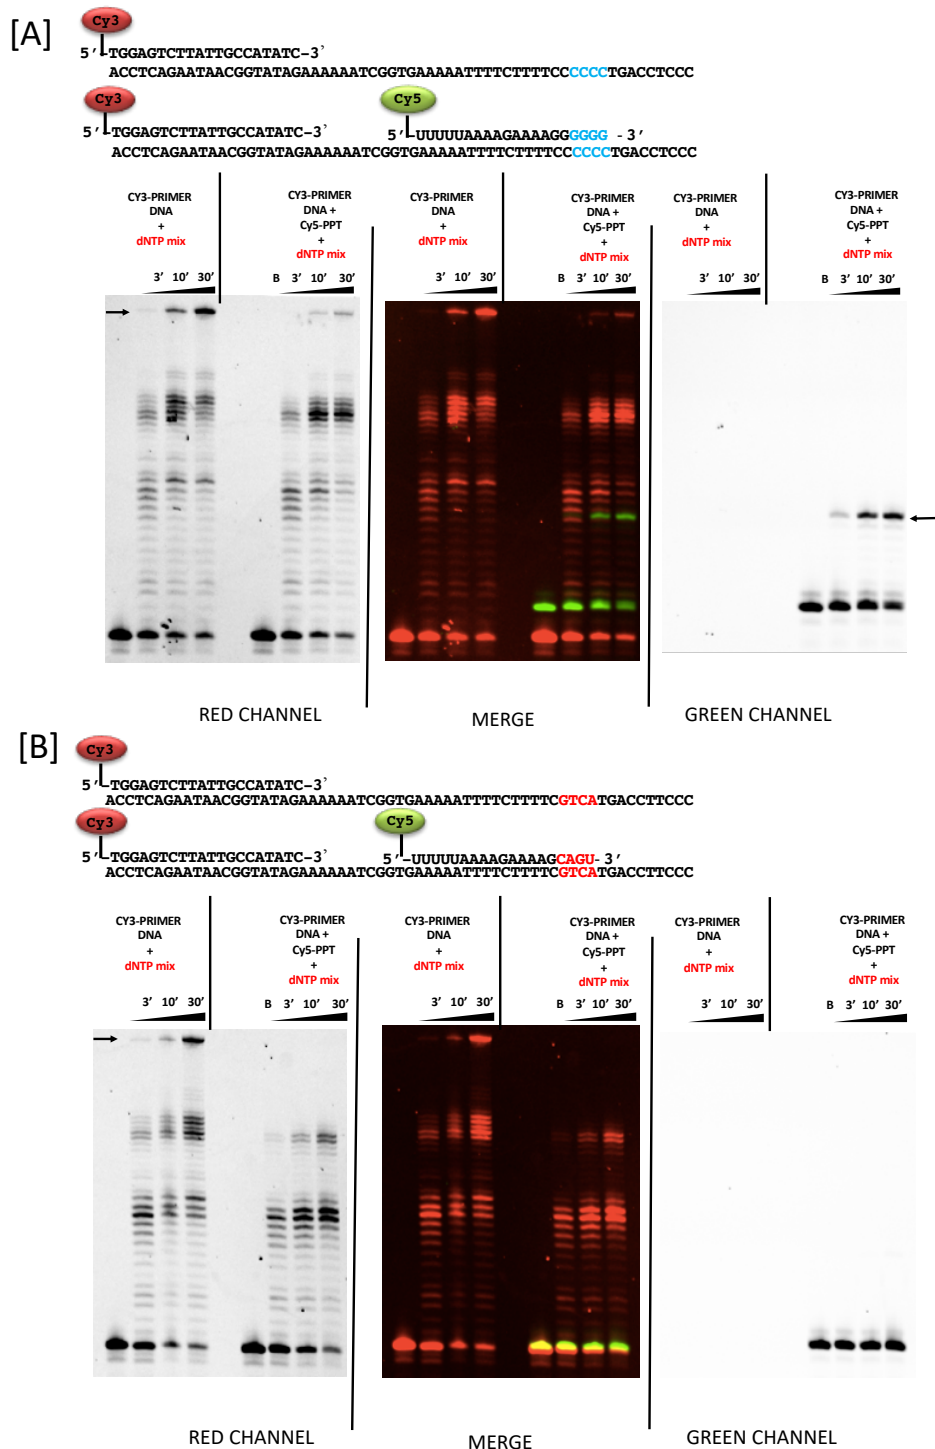

**Figure S5. PPT processing by HIV-1 RT E478Q.** Elongation and strand displacement WT 3'-PPT (A) and mutated 3'-PPT (B). Reaction products resolved by high voltage denaturing 15% polyacrylamide gel electrophoresis (Acrylamide/bisacrylamide ratio 19:1, 7M Urea in Tris Borate EDTA buffer 1X) and visualized by fluorescent dual channel imaging (ChemiDoc Biorad). Bands were analyzed and quantified by ImageLab™ version 6.0.1.



sequence. Reaction products resolved by high voltage denaturing 15% polyacrylamide gel electrophoresis (Acrylamide/bisacrylamide ratio 19:1, 7M Urea in Tris Borate EDTA buffer 1X) and visualized by fluorescent dual channel imaging (ChemiDoc Biorad). Bands were analyzed and quantified by ImageLab™ version 6.0.1. Mean  $\pm$  standard deviation of two independent experiments; p values were calculated by paired, two-tailed t tests using GraphPad Prism 6.01 software (GraphPad Software, Inc.; San Diego, CA, USA). Figures were drawn with GraphPad Prism 6 version 6.01.
